# Supplementary material for: Sublethal irradiation promotes the metastatic potential of hepatocellular carcinoma cells
Source: PubMed Central journal article supplement — Cancer Sci. 2020 Nov 29;112(1):265–74. doi: 10.1111/cas.14724 (PMC7780048; doi:10.1111/cas.14724), 2020-11-29
Supplement: CAS-112-265-s001.pdf [file CAS-112-265-s001.pdf]

Supplementary Fig. 1.

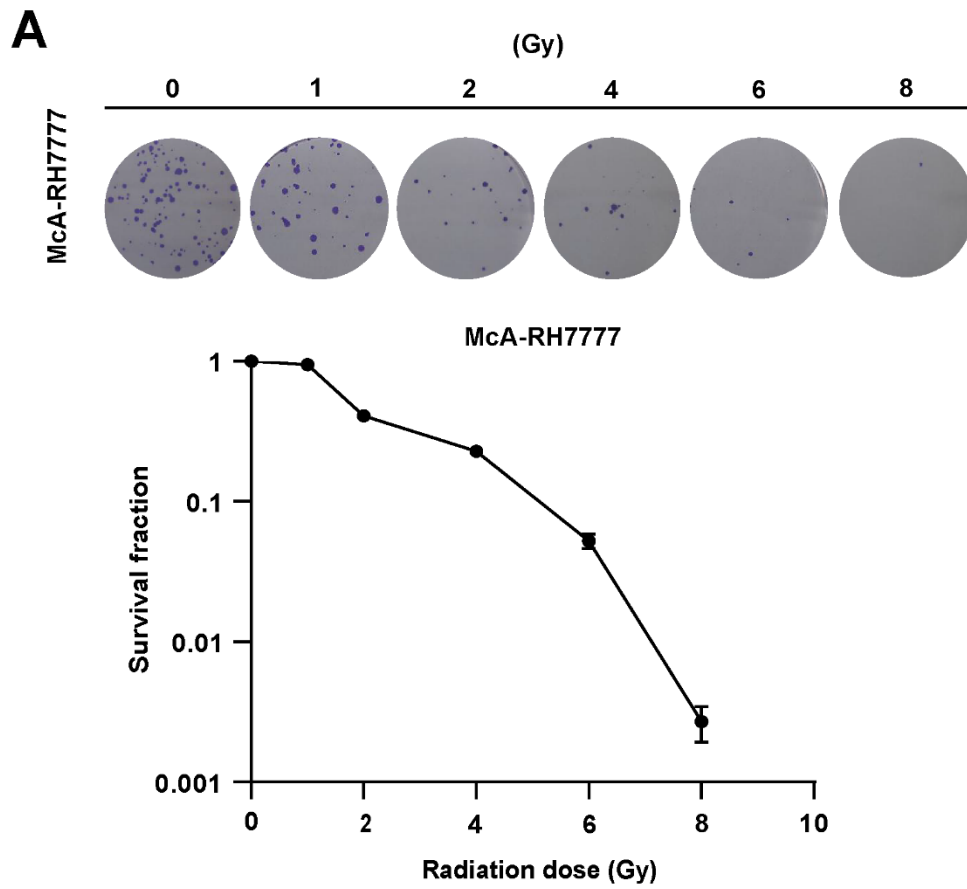

McA-RH7777 cells were plated in 6-well plates for 6 h, and then irradiated with 0 to 8Gy of X-ray using a linear accelerator. The cells were grown at 37°C for 14 days, and the number of colonies consisting of 50 or more cells was counted. Each experiment was performed at least three times. The dose survival curves were plotted and the values of  $D_0$ ,  $D_q$  were calculated using SigmaPlot 14.0 software.

Supplementary Fig. 2.

**A**

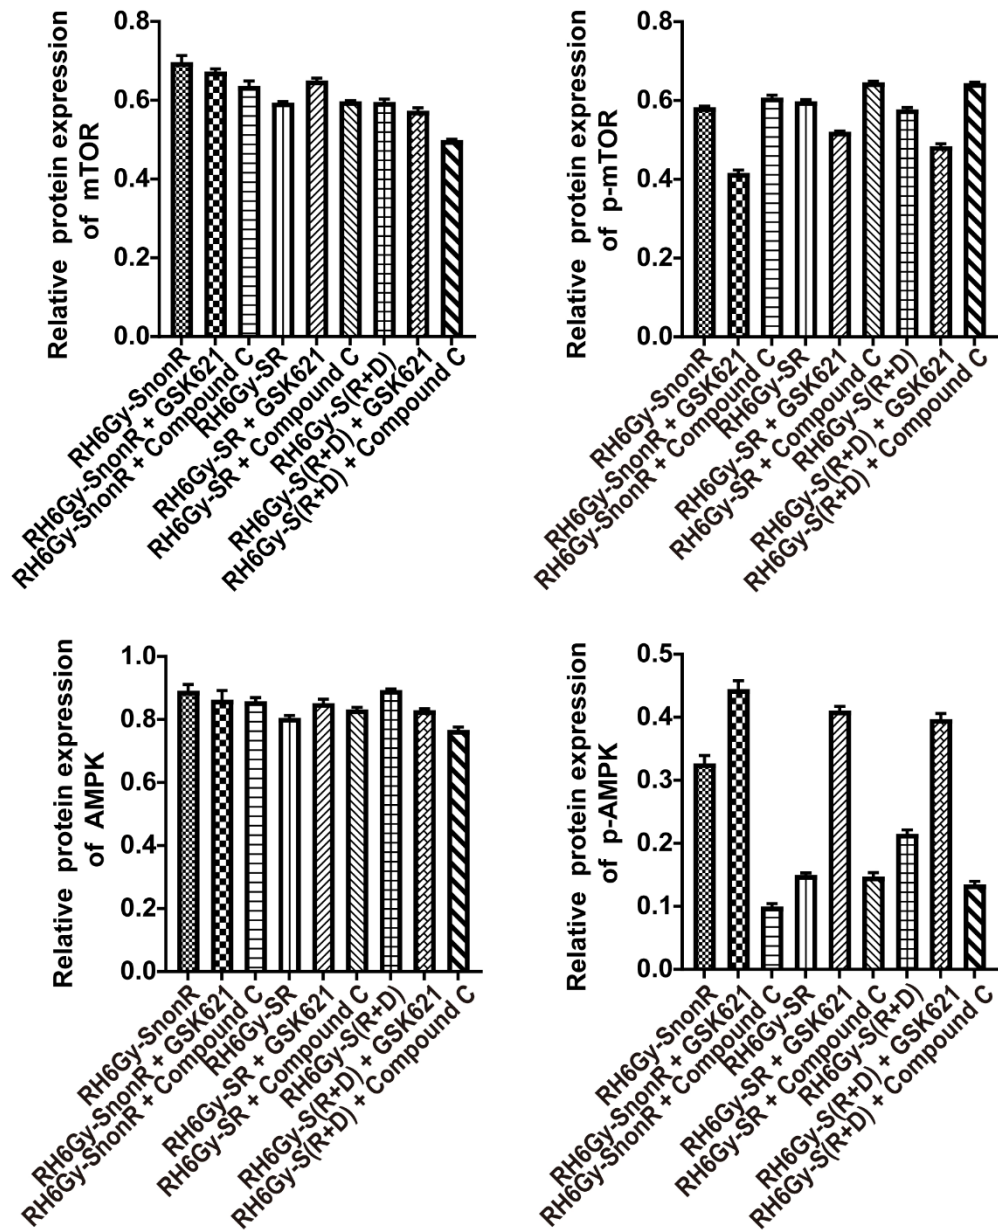

Comparison of p-AMPK, AMPK, p-mTOR and mTOR expression in RH6Gy cells, quantification of western blotting data. Error bars represent the mean ± standard deviation.

Supplementary Fig. 3.

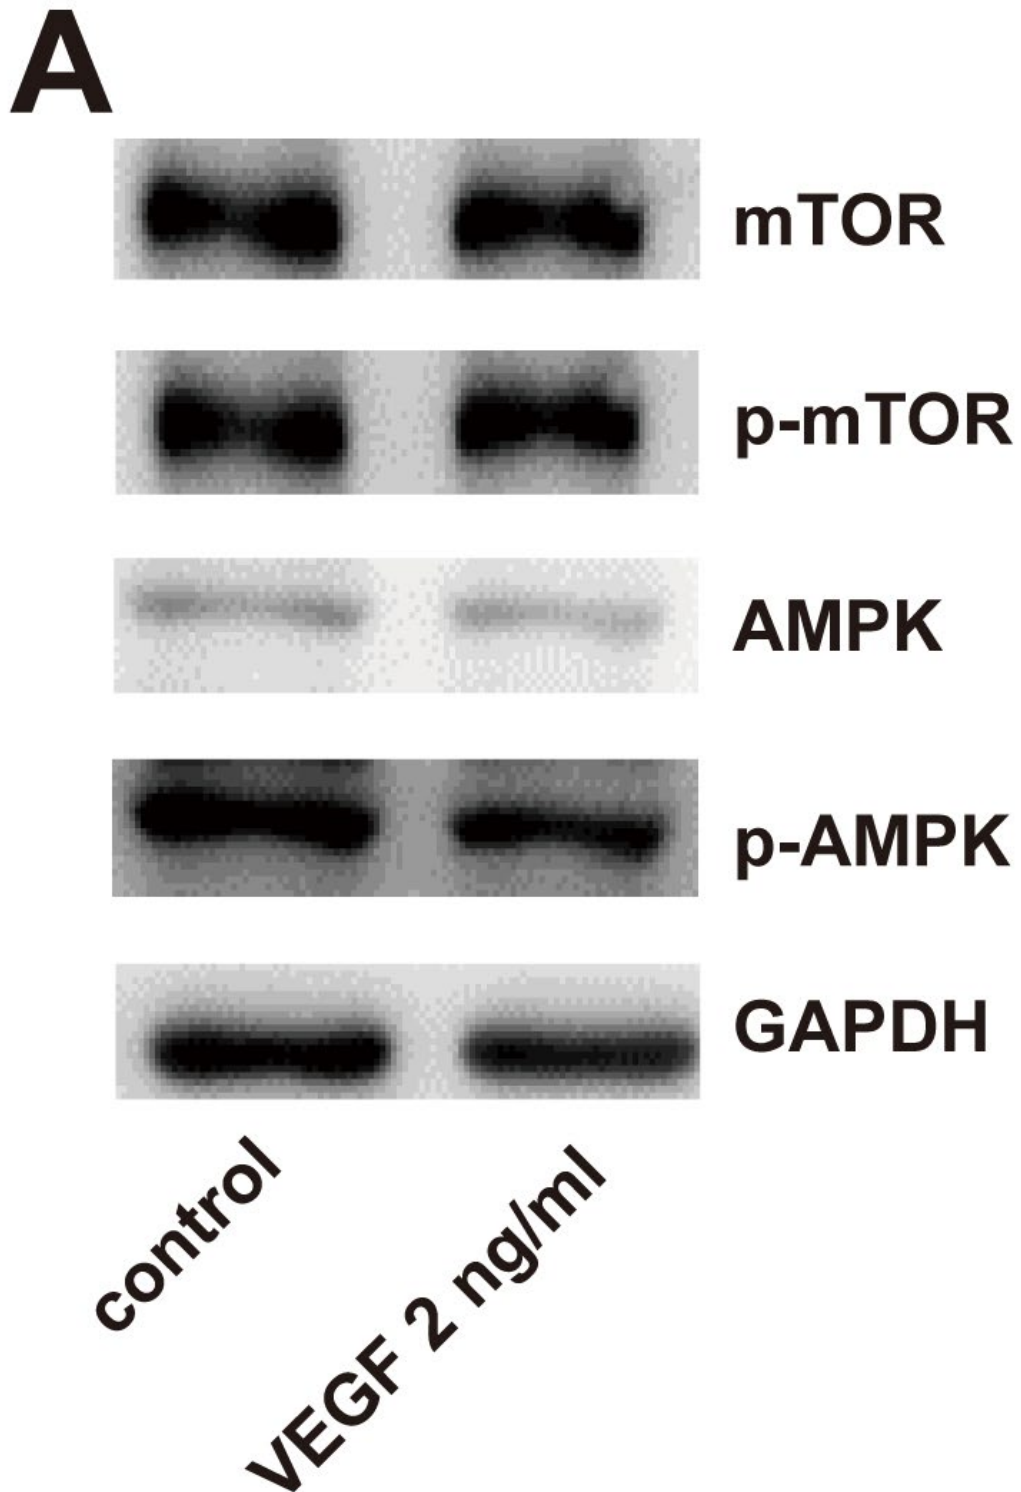

Comparison of p-AMPK, AMPK, p-mTOR and mTOR expression in RH6Gy cells treated with VEGF, western blotting image.
